# Supplementary material
Source: Springer Nature journal article supplement (https://www.springermedizin.de/resource/supplementary/12933_2010_330_MOESM3_ESM.pdf/9538168)

■ Coronary artery disease

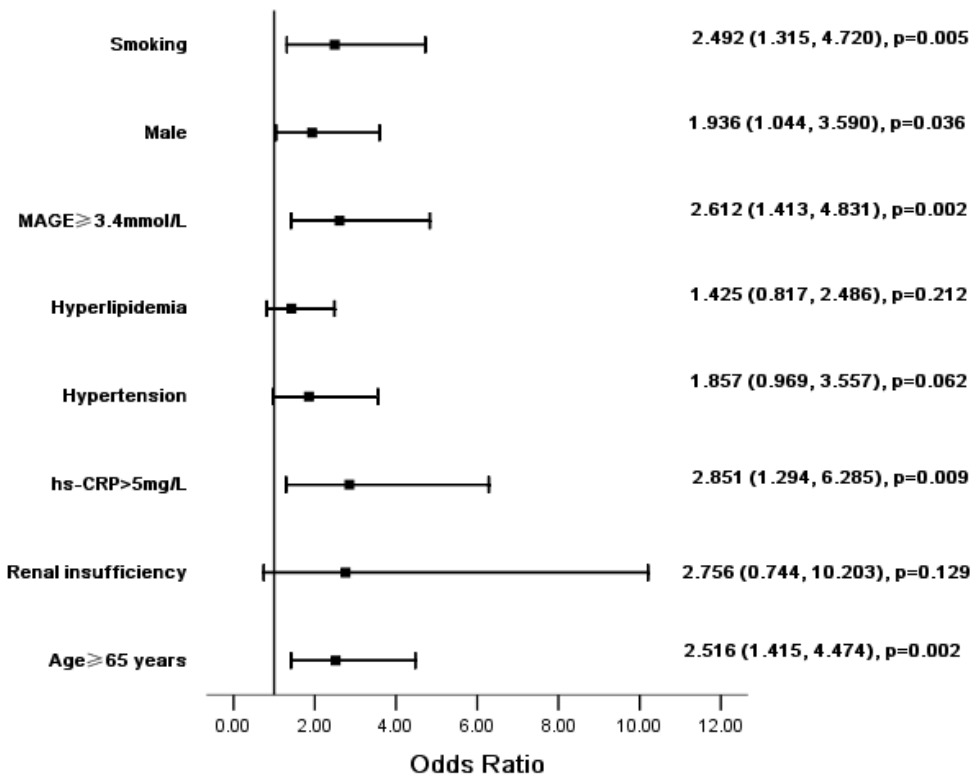

Supplement: MOESM3 [file 9538168]
